# Supplementary material for: Investigation of the influence of substituents on the dielectric properties of polyethylene derivatives
Source: Royal Society of Chemistry journal article supplement (doi:10.1039/d4lp00117f), 2024-06-18
Supplement: d4lp00117f1.pdf [file d4lp00117f1.pdf]

# Supporting Information

## **Investigation of the substituent influence on dielectric properties for polyethylene derivatives**

*Bing Zhong<sup>†,‡</sup>, Yin Zhang<sup>†,‡</sup>, Wei You<sup>†,‡,\*</sup>, and Yu Wang<sup>†,\*</sup>*

<sup>†</sup> Beijing National Laboratory for Molecular Sciences (BNLMS), CAS Key  
Laboratory of Engineering Plastics, Institute of Chemistry, Chinese Academy of  
Sciences, Beijing, 100190, China

<sup>‡</sup> University of Chinese Academy of Sciences, Beijing 100049, China

\* Corresponding authors: Yu Wang (ywang507@iccas.ac.cn)

Wei You (weiyou@iccas.ac.cn)

## General Information

### *Materials*

Poly(ethylene-co-vinyl acetate) (EVA, VA=40 wt%=18 mol%, melt index @190 °C=52 g/10 min), was purchased from Aladdin Co., Ltd. Shanghai, China. 1,1'-(azodicarbonyl)-dipiperidine (ADDP) was purchased from Innochem Co., Ltd., Beijing, China. All abovementioned chemicals were used as received without further purification.

### *Characterization and Instrumentation*

Fourier transform infrared (FT-IR) spectrum were recorded on a Thermo Fisher Nicolet 6700 FTIR spectrometer. The measurement was carried out in the range of 4000–650  $\text{cm}^{-1}$  with the number of scans per spectrum of 32 and the spectruml resolution of 4  $\text{cm}^{-1}$ .  $^1\text{H}$  NMR and  $^{13}\text{C}$  NMR spectra were obtained using a Bruker Avance III 400 HD spectrometer operating at 400 MHz chloroform-d or 1,2-dichlorobenzene- $d_4$  solvents. Molecular weight and polydispersity ( $\mathcal{D}$ ) were measured by gel permeation chromatography (Agilent 1260 Infinity II) in THF (40 °C) mobile phase based on narrowly distributed polystyrene (PS) standard with a flow rate of 0.3 mL/min. Melting and glass transition behavior of the polymers were measured by differential scanning calorimetry (DSC) using a TA Q200 instrument. The samples were heated under nitrogen from 60 °C to 200 °C at a rate of 20 °C per minute and isothermal for 3 min, then cooled to –130 °C at a rate of 10 °C per minute, followed by heating to 200 °C at a rate of 10 °C per minute. The  $T_m$  and  $T_g$  were determined from the second heating run, and the crystallization temperature  $T_c$  was obtained from the cooling trace.

## Experimental Procedures

### Preparation of PE-OTol

For information on the raw materials and reagents used and the procedure for the synthesis of EVOH, please refer to the *General Information* and *Preparation of EVOH* sections in the Supplementary Information of reference 43 in the main text. PE derivative PE-OTol was prepared by using EVOH (1 mmol of functionality) and PPh<sub>3</sub> (3 mmol) were dissolved in THF (20 mL), followed by adding *p*-cresol (3 mmol). After stirred for 15 min, ADDP (3 mmol) and BHT (50 mg) were added. The mixture was allowed to stir at 25 °C for 16 hours before precipitation and sonication in methanol for three times. PE-OTol were obtained after drying under vacuum with the isolated yield of 92%. <sup>1</sup>H NMR (400 MHz, CDCl<sub>3</sub>): δ 7.11-6.95 (br m, 2H), δ 6.82-6.66 (br m, 2H), δ 4.21-4.06 (br m, 1H), δ 2.27 (s, 3H), δ 1.76-1.52 (br m, 8H), δ 1.43-0.98 (br m, 34H); <sup>13</sup>C NMR (100 MHz, CDCl<sub>3</sub>): δ 156.7, 129.9, 129.6, 115.9, 77.0, 34.0, 29.7, 27.2, 25.4, 20.5; IR (neat): 2918 (s), 2850 (s), 1611 (m), 1507 (s), 1458 (m), 1233 (s), 816 (m), 718(m).

Table S1. Determined dielectric properties of the synthesized PE derivatives.

| sample            | $\epsilon'$ @10 <sup>-2</sup> Hz | $\epsilon'$ @10 <sup>0</sup> Hz | $\epsilon'$ @10 <sup>3</sup> Hz | $\epsilon'$ @10 <sup>7</sup> Hz | $\omega_p^a$ (Hz)    | $\epsilon''_p^b$ |
|-------------------|----------------------------------|---------------------------------|---------------------------------|---------------------------------|----------------------|------------------|
| LLDPE             | 2.03                             | 2.03                            | 2.03                            | 2.04                            | N.A.                 | N.A.             |
| PE-Br             | 14.24                            | 5.83                            | 2.82                            | 2.26                            | 1.8×10 <sup>6</sup>  | 0.16             |
| PE-I              | 129.47                           | 24.80                           | 4.35                            | 2.61                            | 1.8×10 <sup>6</sup>  | 0.31             |
| PE-OPh            | 3.71                             | 3.38                            | 3.33                            | 2.75                            | 3.2×10 <sup>5</sup>  | 0.15             |
| PE-OTol           | 2.21                             | 1.97                            | 1.93                            | 1.59                            | 8.7×10 <sup>4</sup>  | 0.10             |
| PE-ONaph          | 3.60                             | 2.89                            | 2.64                            | 2.57                            | N.A.                 | N.A.             |
| PE-N <sub>3</sub> | 14.10                            | 5.09                            | 4.35                            | 3.52                            | N.A.                 | N.A.             |
| PE-Tr             | 5.07                             | 4.80                            | 2.98                            | 2.37                            | 5.6×10 <sup>1</sup>  | 0.50             |
| PE-Naph           | 2.31                             | 2.27                            | 2.24                            | 2.22                            | N.A.                 | N.A.             |
| PE-pip            | 4.59                             | 3.40                            | 2.65                            | 2.46                            | 2.1×10 <sup>-1</sup> | N.A.             |
| PE-NB             | 2.89                             | 2.39                            | 2.20                            | 2.18                            | N.A.                 | N.A.             |

<sup>a</sup> Corresponding frequency at the  $\epsilon''$  peak.

<sup>b</sup> Peak value in the plot of  $\epsilon''$  versus frequency.

Table S2. The determined elemental composition in the blends of PE-Br/LLDPE, PE-I/LLDPE, and PE-OPh/LLDPE. The PE derivatives content is 5.9 wt% for the blends

| sample       | C /wt%   | Br/ wt% | I /wt%  | O /wt%  | total /wt% |
|--------------|----------|---------|---------|---------|------------|
| PE-Br/LLDPE  | 98.1±0.3 | 1.9±0.4 | 0.0     | 0.0     | 100.0      |
| PE-I/LLDPE   | 98.0±0.6 | 0.0     | 2.0±0.6 | 0.0     | 100.0      |
| PE-OPh/LLDPE | 99.0±0.3 | 0.0     | 0.0     | 1.0±0.7 | 100.0      |

Table S3. Determined mechanical properties of the selected PE derivatives, their blends with the LLDPE matrix, and EVA/LLDPE blend. The PE derivative content is 5.9 wt% for all the blends.

| sample       | Young's modulus<br>(MPa) | stress-at-break<br>(MPa) | strain-at-break<br>(%) | stress-at-yield<br>(MPa) |
|--------------|--------------------------|--------------------------|------------------------|--------------------------|
| LLDPE        | 36.1±1.5                 | 9.2±1.3                  | 496.5±262.9            | 8.7±0.6                  |
| PE-Br        | 3.8±0.5                  | 8.4±0.7                  | 1069.6±127.8           | N.D. <sup>a</sup>        |
| PE-I         | 1.9±0.2                  | 3.7±0.1                  | 429.7±84.0             | N.D.                     |
| PE-OPh       | 2.9±0.8                  | 11.5±2.5                 | 531.3±85.0             | N.D.                     |
| PE-Br/LLDPE  | 58.9±3.7                 | 12.5±2.3                 | 1066.8±308.2           | 9.3±0.1                  |
| PE-I/LLDPE   | 56.7±2.4                 | 7.6±2.4                  | 443.6±250.1            | 8.9±0.3                  |
| PE-OPh/LLDPE | 54.2±1.5                 | 13.0±1.6                 | 1106.2±165.8           | 8.9±0.1                  |
| EVA/LLDPE    | 69.4±0.9                 | 11.8±0.5                 | 917.8±82.8             | 8.6±0.5                  |

<sup>a</sup> N.D. means not determined.

Table S4.  $T_{g,DMA}$  values of PE derivatives of PE-Br, PE-I, PE-OPh and their blends, the LLDPE is used as reference material. The PE derivative content is 5.9 wt% for the blends.

| Sample       | $T_{g,DMA}$ (°C) |
|--------------|------------------|
| LLDPE        | -22.9            |
| PE-Br        | -18.7            |
| PE-Br/LLDPE  | -25.5, 46.3      |
| PE-I         | -18.1            |
| PE-I/LLDPE   | -31.6, 43.2      |
| PE-OPh       | -14.1            |
| PE-OPh/LLDPE | -24.2, 29.8      |

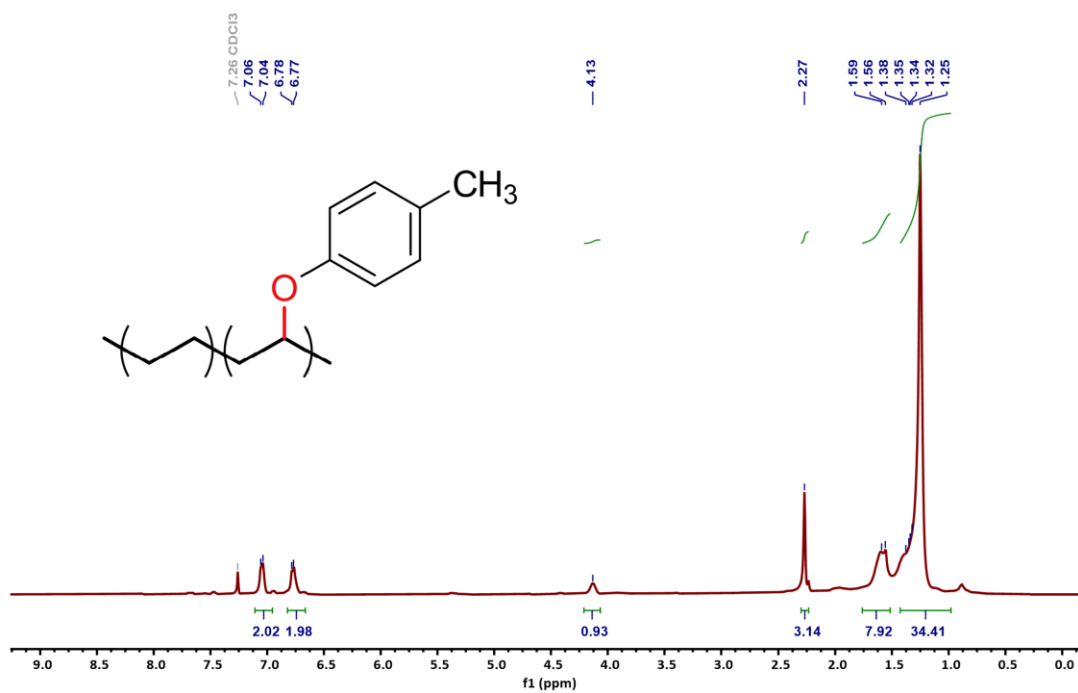

Figure S1. <sup>1</sup>H NMR spectra of the synthesized PE-OTol in CDCl<sub>3</sub>.

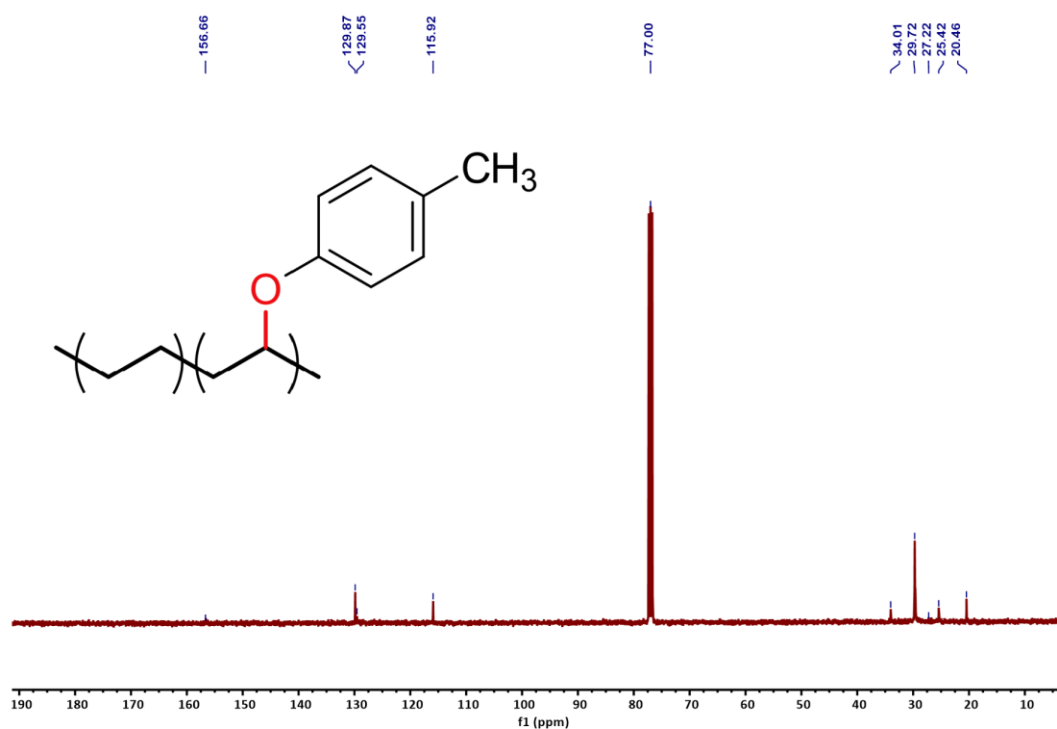

Figure S2. <sup>13</sup>C NMR spectra of the synthesized PE-OTol in CDCl<sub>3</sub>.

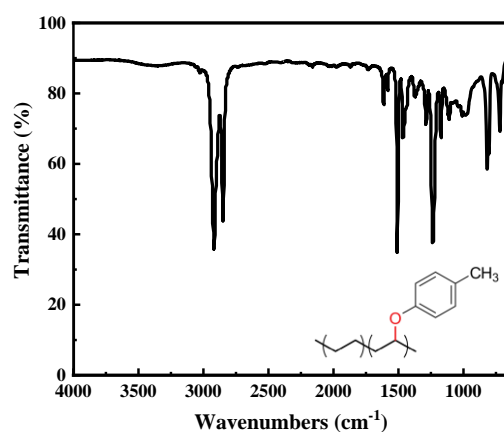

Figure S3. FTIR spectrum of the synthesized PE-OTol.

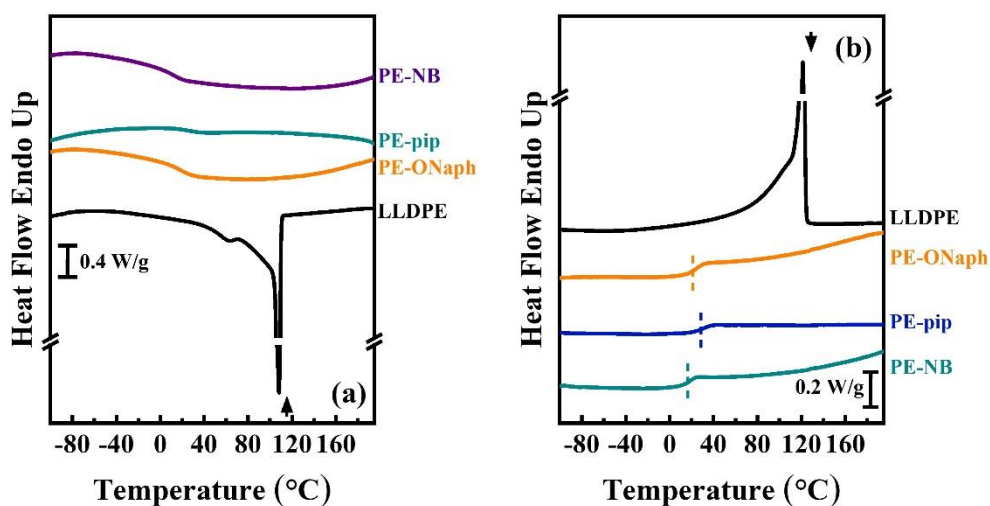

Figure S4. DSC traces of PE-ONaph, PE-pip, and PE-NB during (a) cooling and (b) second heating. The determined  $T_g$  is indicated by a dash line. A reference for comparison is provided with LLDPE featuring saturated C-H bonds (black line). No evident  $T_c$  and  $T_m$  is detected in the plots.

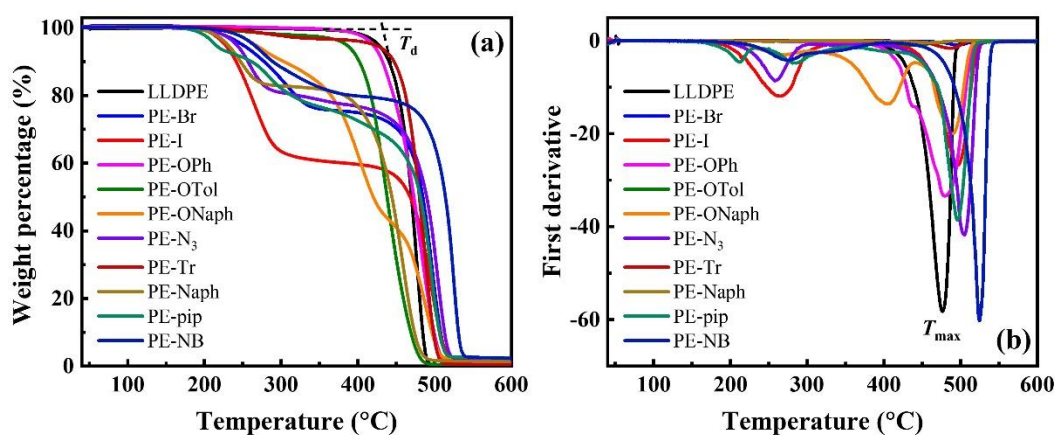

Figure S5. TGA results of the PE derivatives: (a) plots of weight percentage versus temperature and (b) their first derivative curves. LLDPE (block line) is used as the basis of comparison.

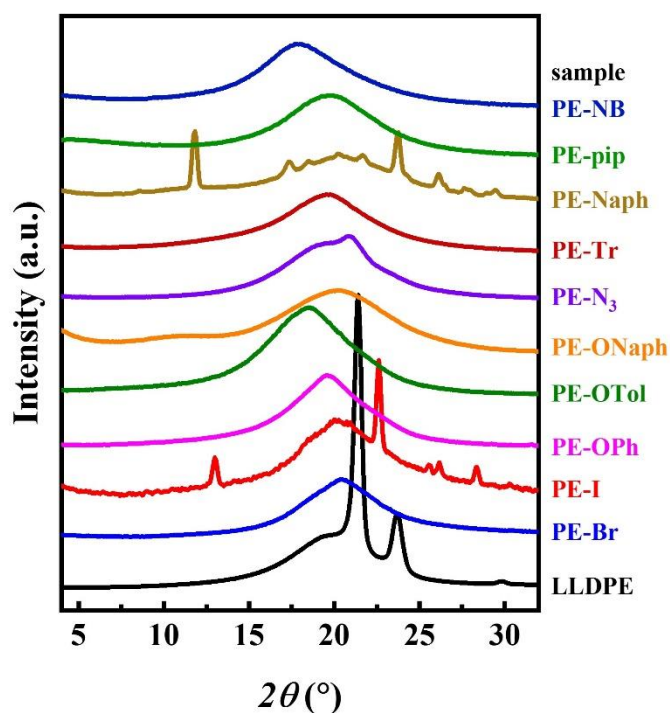

Figure S6. Comparison of the 1-D WAXD curves of the obtained PE derivatives. The curves have been vertically shifted to avoid overlap.



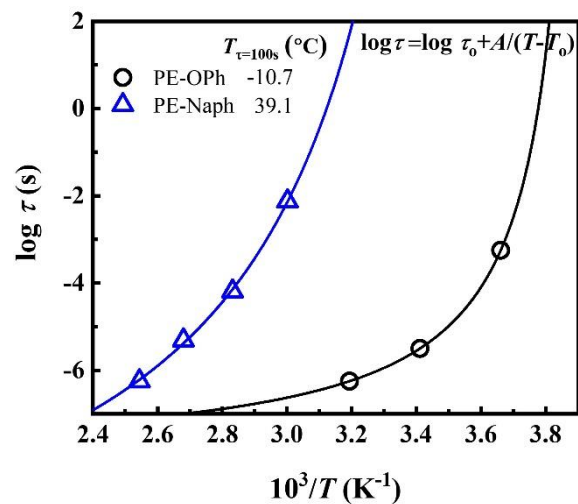

Figure S7. Semi-log plots of relaxation time versus temperature inverse for PE-OPh and PE-Naph. Solid lines are the fitting results by Vogel-Fulcher-Tammann (VFT) equation, which is inserted in the figure. The temperature corresponding to a relaxation time of 100 s was extrapolated from the fitted line, and determined as the characteristic temperature  $T_{\tau=100s}$  (indicated in the figure).

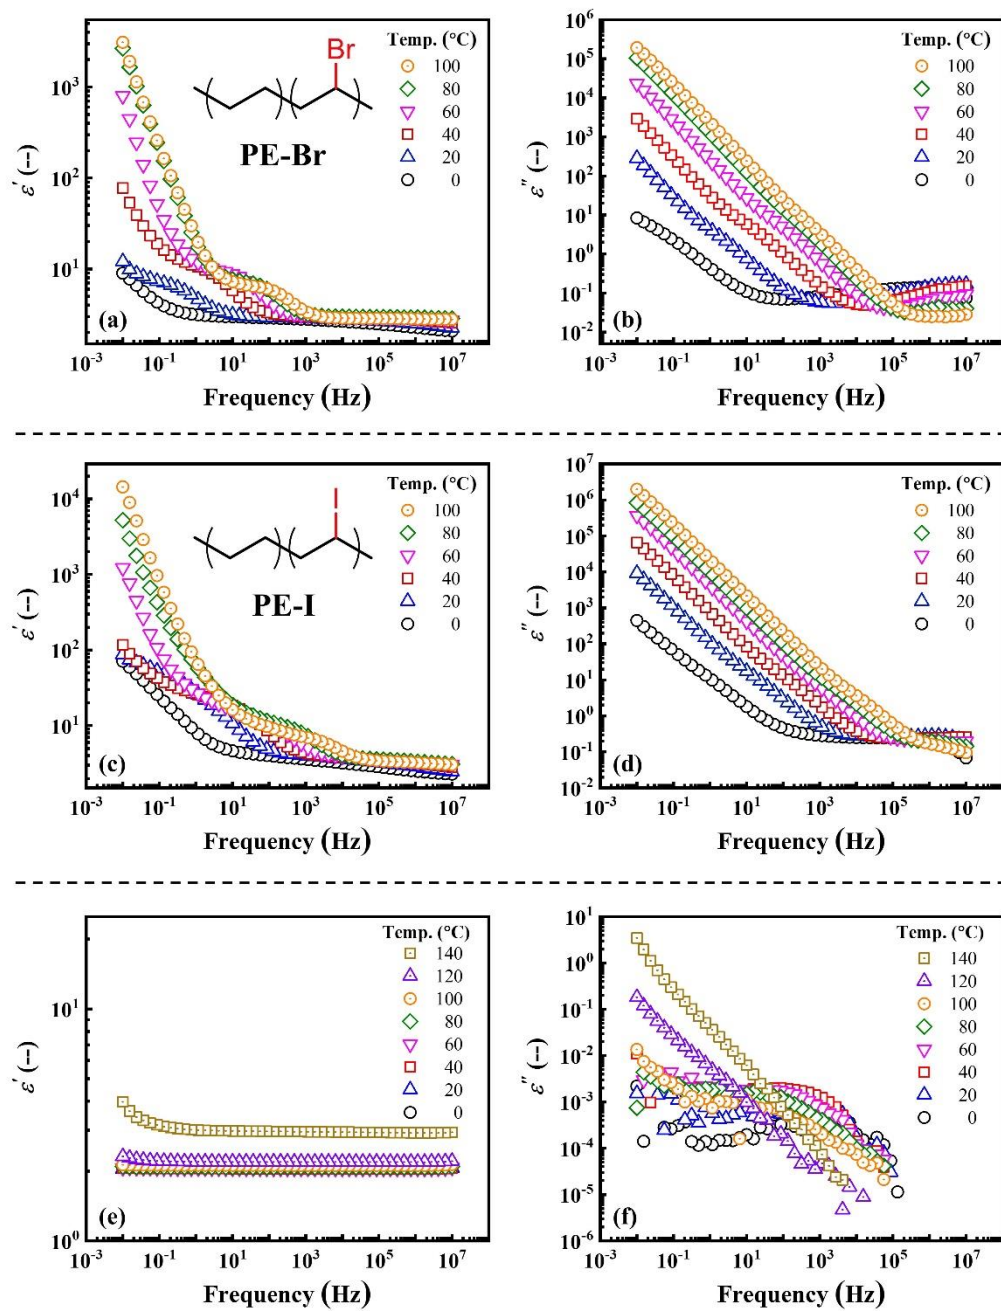

Figure S8. Temperature dependence of the measured dielectric properties of PE derivatives

PE-Br (top), PE-I (middle), and LLDPE (bottom), including the log-log plots of  $\epsilon'$  ((a), (c),

and (e)) and  $\epsilon''$  ((b), (d), and (f)) versus frequency, respectively.

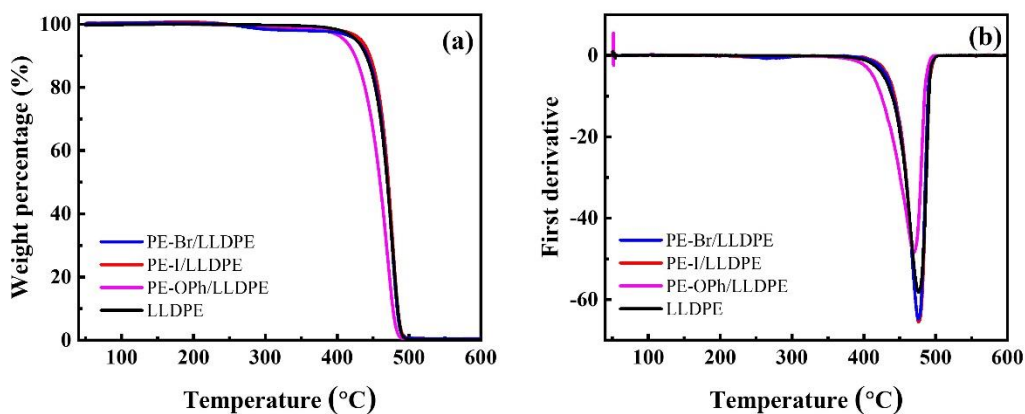

Figure S9. TGA results of the blends of PE derivatives with LLDPE matrix: PE-Br/LLDPE,

PE-I/LLDPE, and PE-OPh/LLDPE. The LLDPE is used a reference material. The PE

derivative content is 5.9 wt% for all the three blends.

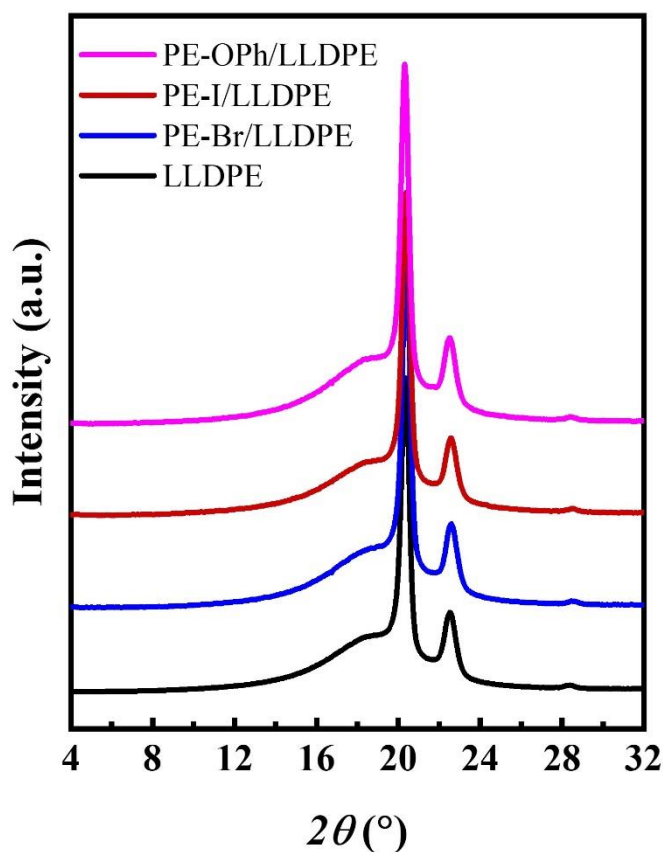

Figure S10. Comparison of the 1-D WAXD curves of the blends of PE-Br/LLDPE, PE-

I/LLDPE, PE-OPh/LLDPE, and the LLDPE matrix. The PE derivative content is 5.9 wt% for

all the three blends.

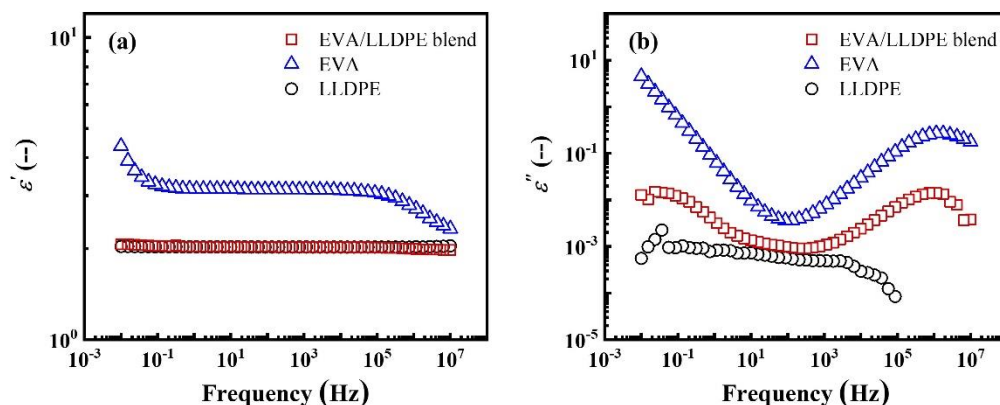

Figure S11. The obtained (a)  $\epsilon'$  and (b)  $\epsilon''$  of the reactant EVA used in this work and its blends with LLDPE, the content of EVA is 5.9 wt%.

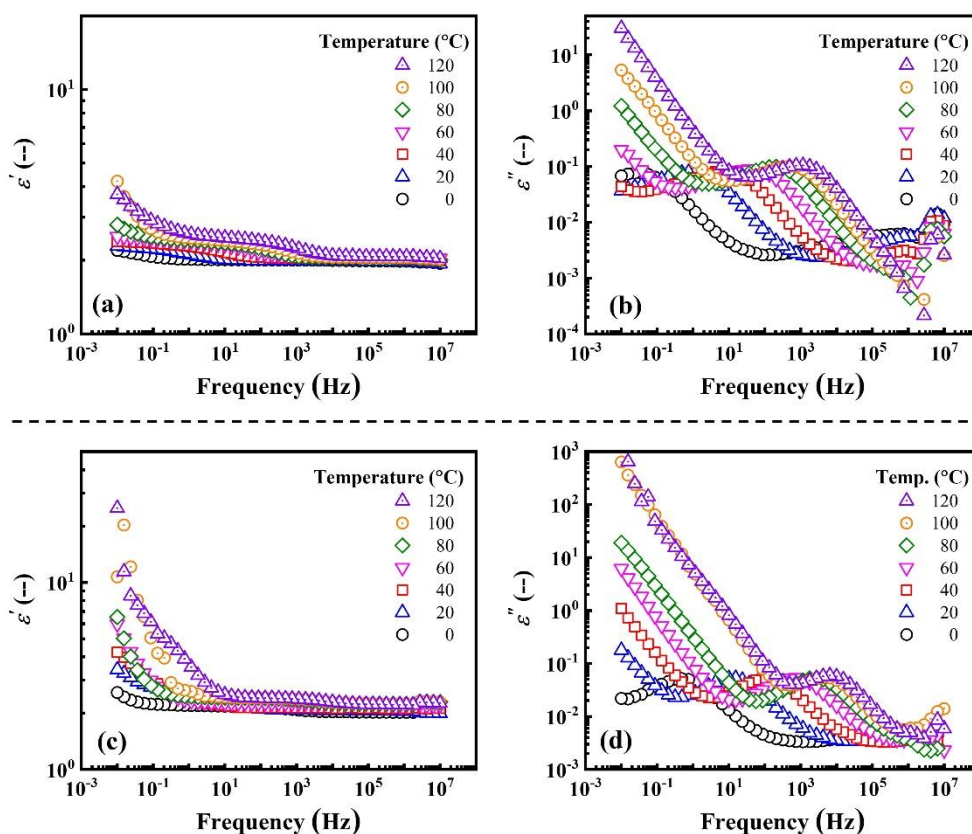

Figure S12. Variable-temperature dielectric results of (a)(b) PE-Br/LLDPE and (c)(d) PE-I/LLDPE, including the  $\epsilon'$  ((a) and (c)) and  $\epsilon''$  ((b) and (d)). The PE derivative content is 5.9 wt% for all the three blends.

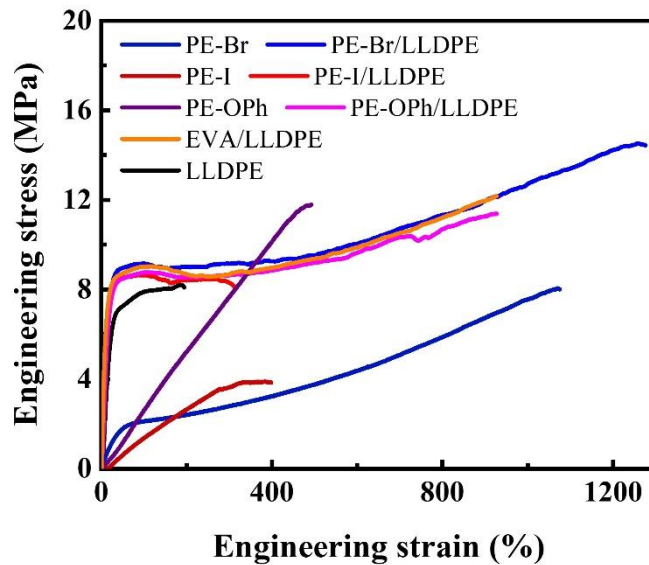

Figure S13. Representative engineering stress-strain curves for the selected PE derivatives, their blends with LLDPE matrix, and the EVA/LLDPE blends. The contents of PE derivatives and EVA in the blends are 5.9 wt%.

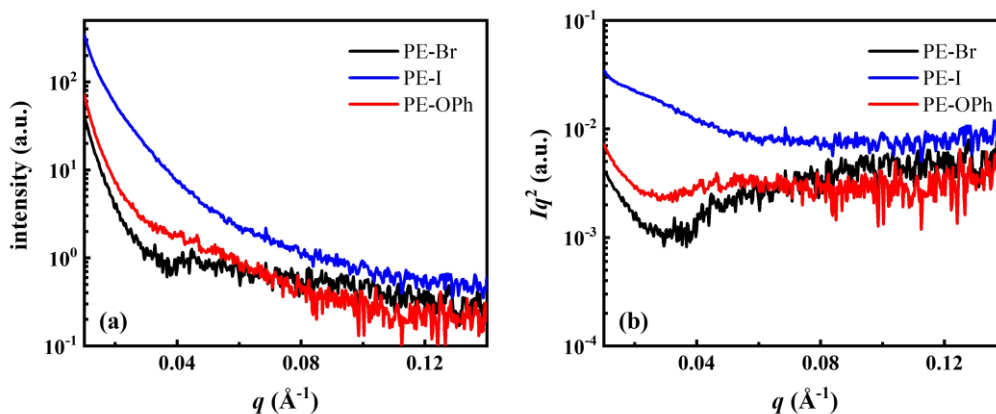

Figure S14. The obtained (a) 1-D SAXS and (b)  $Iq^2$ - $q$  plots of PE derivatives of PE-Br, PE-I, and PE-OPh quenched from 200 °C by a liquid nitrogen bath. From the profiles, it seems that some weak signals could be detected in quenched PE-Br and PE-OPh. However, it could not be distinguished the microphase separation signals from that of crystallization, because a melting peak was observed in the DSC first heating curve.

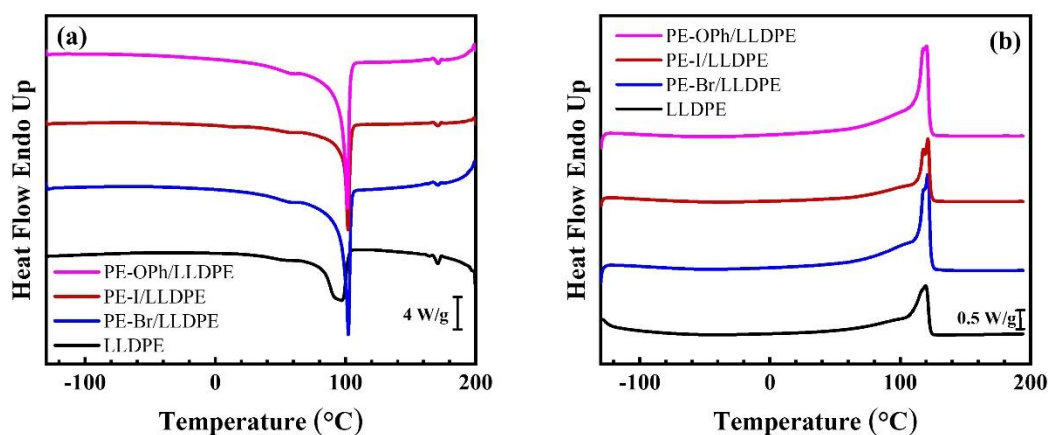

Figure S15. The (a) cooling and (b) second heating DSC traces of PE-Br/LLDPE, PE-I/LLDPE, and PE-OPh/LLDPE. The applied thermal protocol is that firstly heating from 60 °C to 200 °C at a rate of 20 °C/min and isothermal for 3 min to eliminate the thermal history. Then, cooled from 200 °C to -130 °C at a rate of ca. 50 °C/min. The final step is heated from -130 °C to 200 °C at a rate of 10 °C/min. Despite rapid cooling using a liquid nitrogen cooling system, crystallization peaks were still observed in the cooling curves, suggesting the rate was not fast enough to inhibit crystallization. In the second heating traces, no  $T_g$  was determined for any of the samples.
